# Supplementary material for: Limiting nuclearity in formation of polynuclear metal complexes through [2 + 3] cycloaddition: synthesis and magnetic properties of tri- and pentanuclear metal complexes
Source: Royal Society of Chemistry journal article supplement (doi:10.1039/c4dt00378k), 2014-01-01
Supplement: c4dt00378k1.pdf [file c4dt00378k1.pdf]

**Supporting Information**

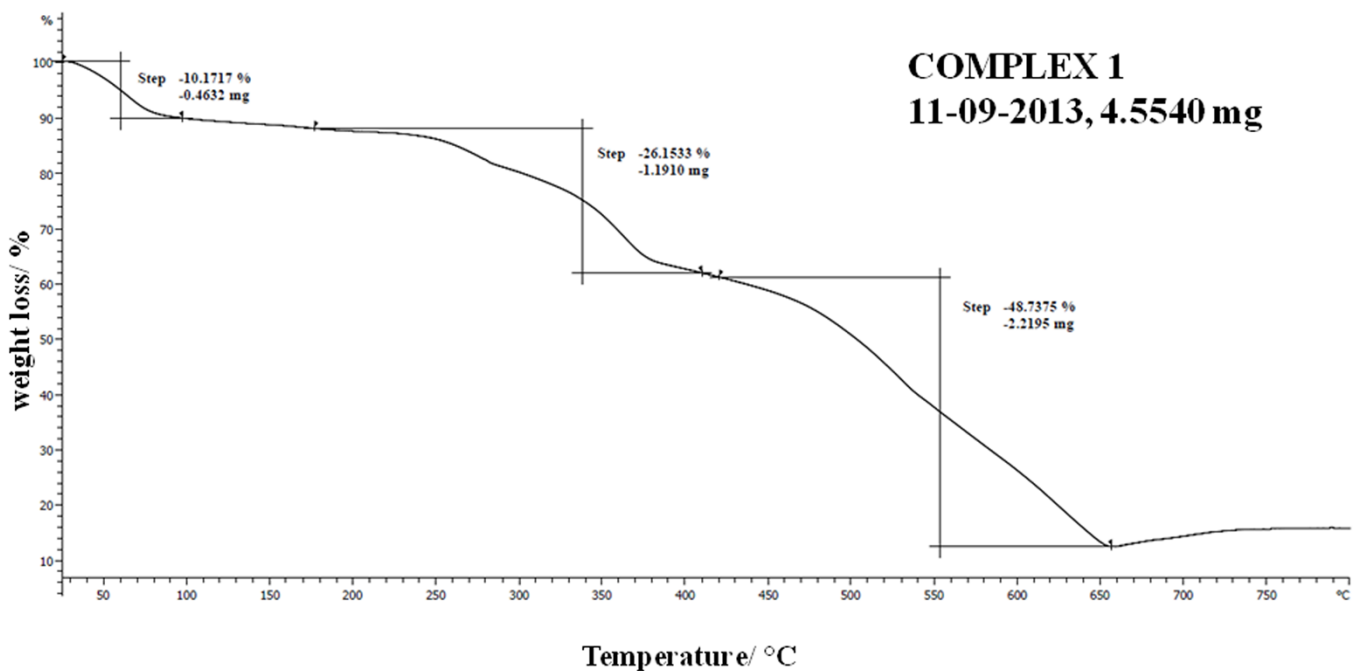

**Figure 1** Thermogravimetric curve of compound **1**. Plot of weight loss/ % against temperature/ °C.

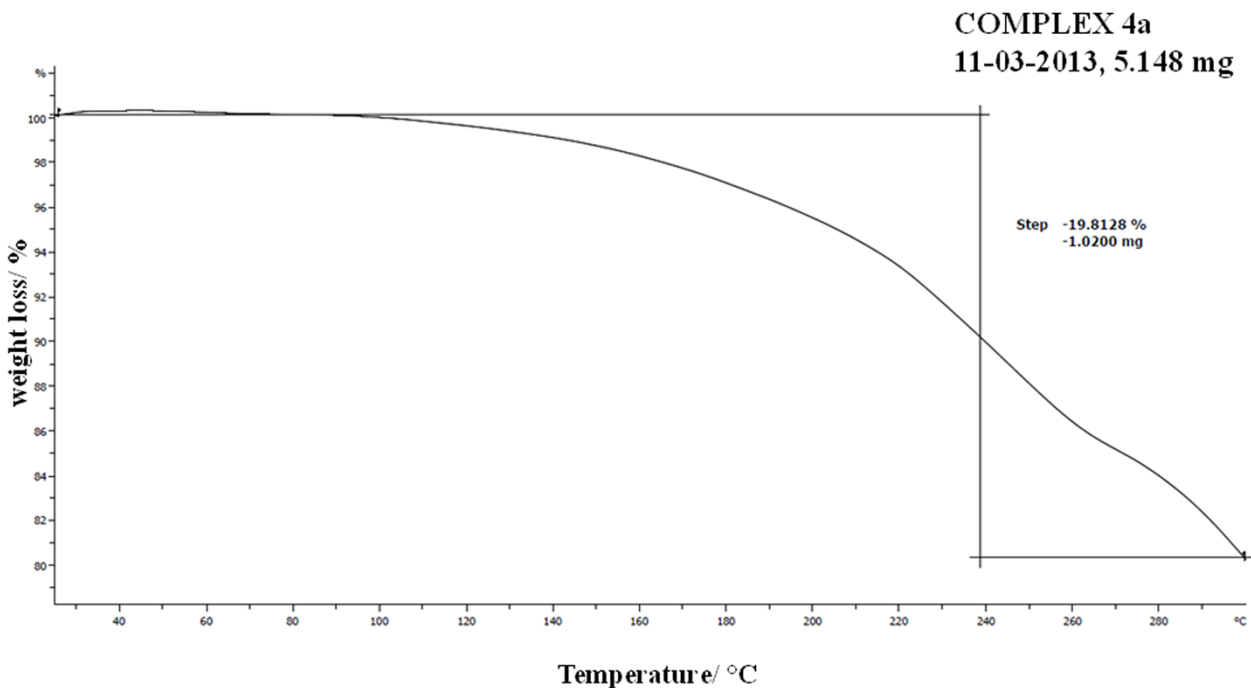

**Figure 2** Thermogravimetric curve of compound **4a**. Plot of weight loss/ % against temperature/ °C.

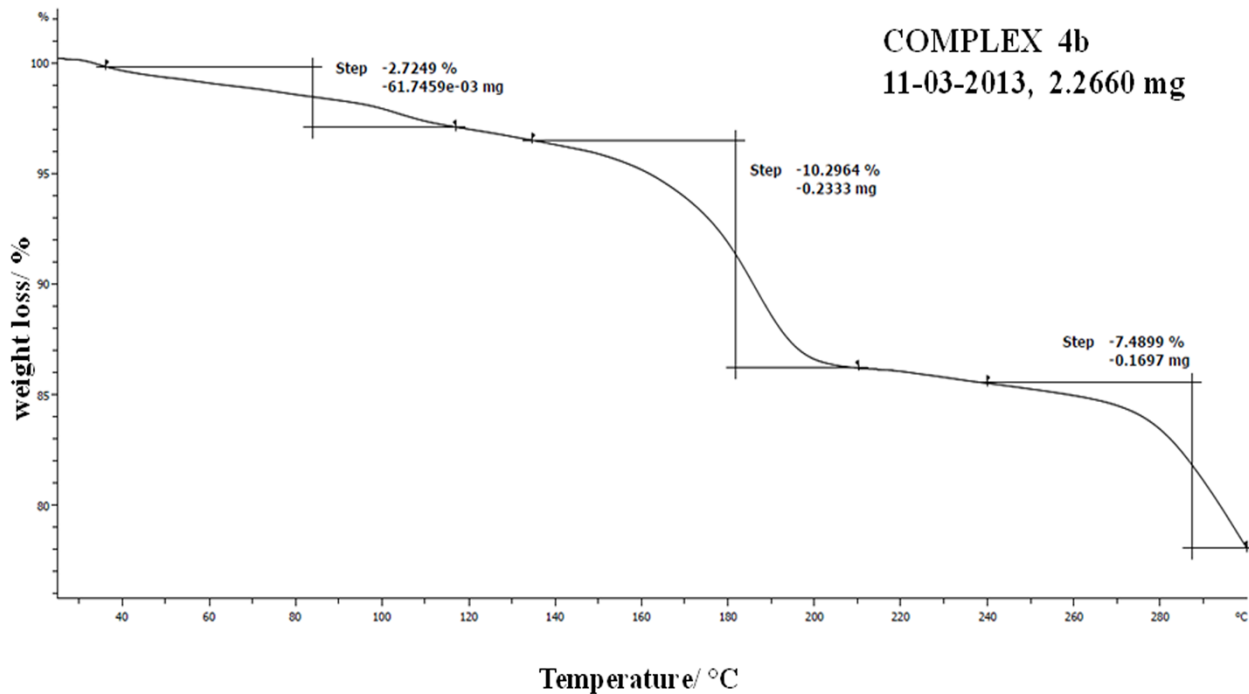

**Figure 3** Thermogravimetric curve of compound **4b**. Plot of weight loss/ % against temperature/ °C.

**Figure 4** Thermogravimetric curve of compound **4c**. Plot of weight loss/ % against temperature/ °C.

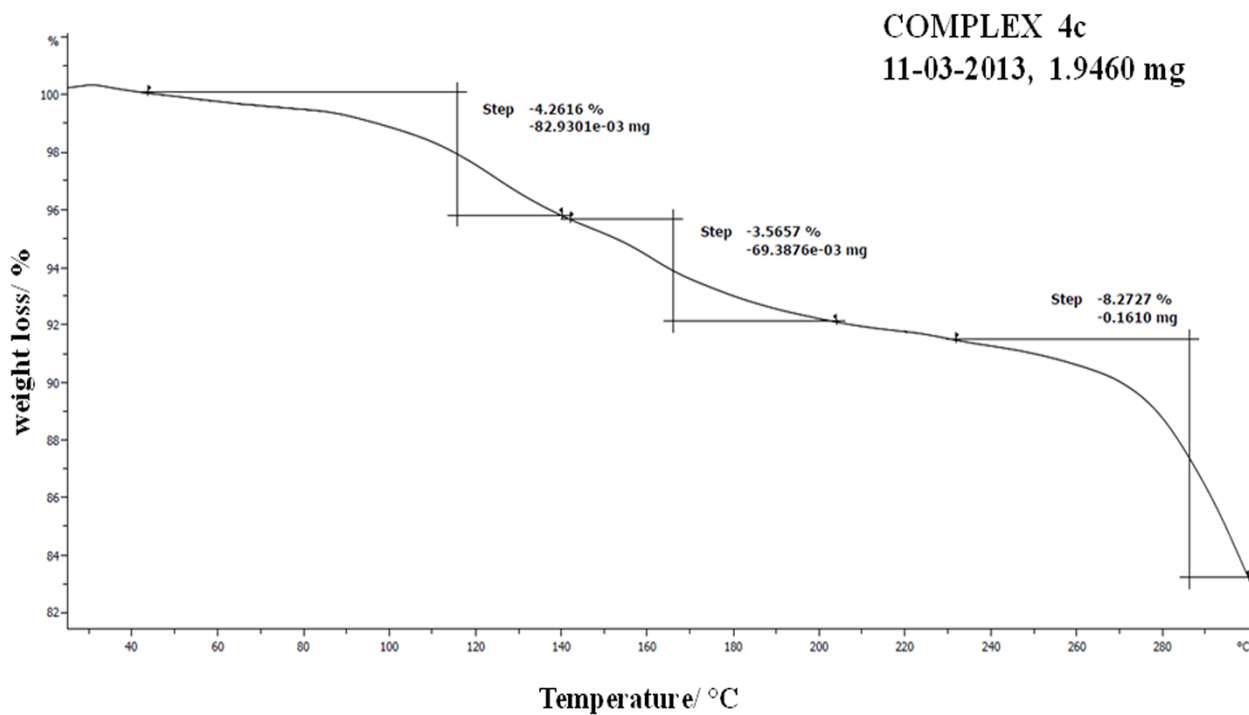

°C.
